# Supplementary material
Source: Springer Nature journal article supplement (https://www.springermedizin.de/resource/supplementary/12990_2007_108_MOESM2_ESM.pdf/9612588)

A: Pain  
Location

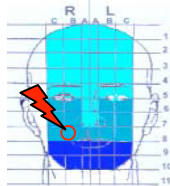

B: fMRI  
Acquisition

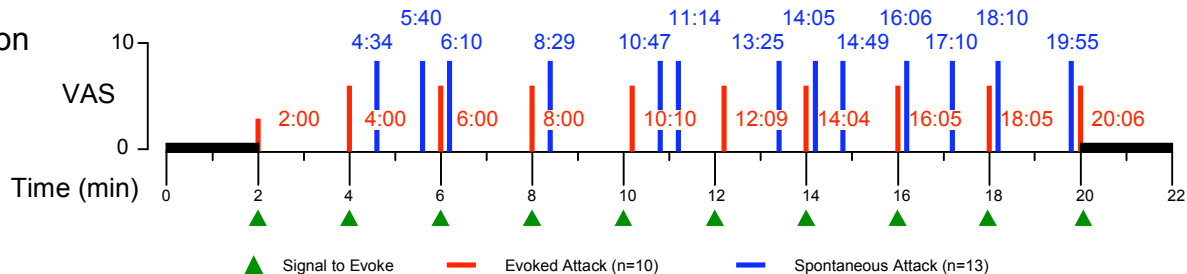

C: Data  
Analysis

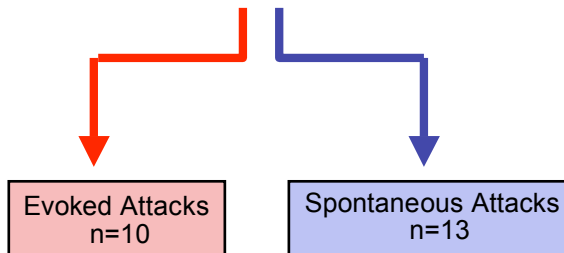

Supplement: MOESM2 [file 9612588]
